# Supplementary material for: SARS-CoV and SARS-CoV-2 are transmitted through the air between ferrets over more than one meter distance
Source: PubMed Central journal article supplement (PMC7955093; doi:10.1038/s41467-021-21918-6), 2021-03-12
Supplement: 41467_2021_21918_MOESM1_ESM.pdf [file 41467_2021_21918_MOESM1_ESM.pdf]

**Supplementary information for**

**SARS-CoV and SARS-CoV-2 are transmitted through the air between ferrets  
over more than one meter distance**

Jasmin S Kutter<sup>1</sup>, Dennis de Meulder<sup>1</sup>, Theo M Bestebroer<sup>1</sup>, Pascal Lexmond<sup>1</sup>, Ard  
Mulders<sup>1</sup>, Mathilde Richard<sup>1</sup>, Ron AM Fouchier<sup>1</sup>, Sander Herfst<sup>1</sup>

<sup>1</sup>Department of Viroscience, Erasmus University Medical Center, Rotterdam, The  
Netherlands.

**Table S1. Detection of single nucleotide polymorphisms by Illumina sequencing**

a. Single nucleotide polymorphisms in the ferret samples present at >5%

|                             | Time after inoculation (dpi)/exposure (dpe) | Nt change | Aa change | Protein    | Reads with the specified substitution (%) |
|-----------------------------|---------------------------------------------|-----------|-----------|------------|-------------------------------------------|
| Donor ferret 1              | 3 dpi                                       | A23032C   | N501T     | Spike      | 95.0                                      |
|                             |                                             | A23586G   | S686G     | Spike      | 96.8                                      |
| Donor ferret 2              | 3 dpi                                       | G228T     | -         | NA (5'UTR) | 8.3                                       |
|                             |                                             | A23032C   | N501T     | Spike      | 53.0                                      |
|                             |                                             | A23586G   | S686G     | Spike      | 84.3                                      |
| Donor ferret 3              | 3 dpi                                       | A23032C   | N501T     | Spike      | 98.0                                      |
|                             |                                             | A23586G   | S686G     | Spike      | 98.3                                      |
|                             |                                             | T29552A   | F9L       | ORF10      | 15.2                                      |
| Donor ferret 4              | 3 dpi                                       | G228T     | -         | NA (5'UTR) | 6.1                                       |
|                             |                                             | C5790T    | L1035F    | Nsp3       | 34.0                                      |
|                             |                                             | A23032C   | N501T     | Spike      | 98.8                                      |
|                             |                                             | A23586G   | S686G     | Spike      | 99.0                                      |
| Indirect recipient ferret 3 | 7 dpe                                       | A23032C   | N501T     | Spike      | 99.6                                      |
|                             |                                             | A23586G   | S686G     | Spike      | 99.6                                      |
|                             |                                             | G29719T   | -         | NA (3'UTR) | 5.8                                       |
| Indirect recipient ferret 4 | 5 dpe                                       | G228T     | -         | NA (5'UTR) | 5.3                                       |
|                             |                                             | C10757T   | D245D     | Nsp5       | 99.3                                      |
|                             |                                             | A23032C   | N501T     | Spike      | 99.8                                      |
|                             |                                             | A23586G   | S686G     | Spike      | 99.2                                      |

b. Presence of the ferret sample single nucleotide polymorphisms in the virus stocks (>1%)

| Nt change | Aa position | Protein | Reads with the specified substitution (%) |                       |
|-----------|-------------|---------|-------------------------------------------|-----------------------|
|           |             |         | Virus stock P1                            | Virus stock P3 VeroE6 |
| G228T     | -           | 5'UTR   | <1                                        | <1                    |
| C5790T    | L1035F      | Nsp3    | <1                                        | <1                    |
| C10757T   | D245D       | Nsp5    | <1                                        | <1                    |
| A23032C   | N501T       | Spike   | 2.0                                       | <1                    |
| A23586G   | S686G       | Spike   | 15.2                                      | 8.1                   |
| T29552A   | F9L         | ORF10   | <1                                        | <1                    |
| G29719T   | -           | 3'UTR   | <1                                        | <1                    |

Nt: nucleotide; Aa: amino acid; NA: not applicable

**Table S2. Sequences of primers and probes used for qRT-PCR analysis**

| Virus        | Oligo name & orientation | Sequence (5'-3')                   |
|--------------|--------------------------|------------------------------------|
| A/H1N1 virus | Forward primer           | CTTCTRACCGAGGTCGAAACGTA            |
|              | Reverse primer           | TCTTGTCTTTAGCCAYTCCATGAG           |
|              | Probe                    | FAM-TCAGGCCCCCTCAAAGCCGAGA-BHQ     |
| SARS-CoV-2   | Forward primer           | ACAGGTACGTTAATAGTTAATAGCGT         |
|              | Reverse primer           | ATATTGCAGCAGTACGCACACA             |
|              | Probe                    | FAM-ACACTAGCCATCCTTACTGCGCTTCG-BHQ |
| SARS-CoV     | Forward primer           | CAAACATTGGCCG CAAATT               |
|              | Reverse primer           | CAATGCGTGACA TTCCAAAGA             |
|              | Probe                    | FAM-CACAATTTGCTCCAAGTGCCTCTGCA-BHQ |
| PDV          | Forward primer           | CGGGTGCCTTTTACAAGAAC               |
|              | Reverse primer           | TTCTTTCCTCAACCTCGTCC               |
|              | Probe                    | Cy5-ATGCAAGGGCCAATTCTTCCAAGTT-BHQ  |

**Table S3. Sequences of primers used for the generation of amplicons for wholegenome sequencing and next-generation sequencing**

Mix 1

| Name                | Sequence                       | Orientation | Volume |
|---------------------|--------------------------------|-------------|--------|
| SARS-CoV-2_1_LEFT   | ACCAACCAACTTTTCGATCTCTTGT      | FWD         | 10µl   |
| SARS-CoV-2_1_RIGHT  | CGAGCATCCGAACGTTTGATGA         | REV         | 10µl   |
| SARS-CoV-2_3_LEFT   | ACGAGCTTGGCACTGATCCTTA         | FWD         | 10µl   |
| SARS-CoV-2_3_RIGHT  | GGTTGCATTCATTTGGTGACGC         | REV         | 10µl   |
| SARS-CoV-2_5_LEFT   | TGTCCAGCATGTCACAATTCAGA        | FWD         | 10µl   |
| SARS-CoV-2_5_RIGHT  | TACAACACGAGCAGCCTCTGAT         | REV         | 10µl   |
| SARS-CoV-2_7_LEFT   | TGGCACTGTTTATGAAAACTCAAACC     | FWD         | 10µl   |
| SARS-CoV-2_7_RIGHT  | TTTCGAGCAACATAAGCCCGTT         | REV         | 10µl   |
| SARS-CoV-2_9_LEFT   | TCACTTTTGAACTTGATGAAAGGATTGA   | FWD         | 10µl   |
| SARS-CoV-2_9_RIGHT  | GATTGTCCTCACTGCCGCTTG          | REV         | 10µl   |
| SARS-CoV-2_11_LEFT  | AAACATGGAGGAGGTGTTGCAG         | FWD         | 20µl   |
| SARS-CoV-2_11_RIGHT | TCTTGTTTTCTCTGTTCAACTGAAGGT    | REV         | 20µl   |
| SARS-CoV-2_13_LEFT  | GCTCCATATATAGTGGGTGATGTTGT     | FWD         | 10µl   |
| SARS-CoV-2_13_RIGHT | AGCCATGTGTTACATAGCCAAGTG       | REV         | 10µl   |
| SARS-CoV-2_15_LEFT  | CTATTCTGGACAATCTACACAAGTGGT    | FWD         | 10µl   |
| SARS-CoV-2_15_RIGHT | AGCATCTTGTAGAGCAGGTGGA         | REV         | 10µl   |
| SARS-CoV-2_17_LEFT  | GCTGTTATGTACATGGGCACACT        | FWD         | 10µl   |
| SARS-CoV-2_17_RIGHT | GCTTGCCTTTGGATATGGTTGG         | REV         | 10µl   |
| SARS-CoV-2_19_LEFT  | TGTTACATAAACCTATTGTTGGCATGT    | FWD         | 10µl   |
| SARS-CoV-2_19_RIGHT | TCCAAGGGGACACTATTAACAGCA       | REV         | 10µl   |
| SARS-CoV-2_21_LEFT  | AGCAAAGAATACTGTTAAGAGTGTCGG    | FWD         | 20µl   |
| SARS-CoV-2_21_RIGHT | TCGGGGCCATTTGTACAAGATT         | REV         | 20µl   |
| SARS-CoV-2_23_LEFT  | ACTATTGTTAATGGTGTTAGAAGGTCCT   | FWD         | 10µl   |
| SARS-CoV-2_23_RIGHT | GCAACTTCCGCACTATCACCAA         | REV         | 10µl   |
| SARS-CoV-2_25_LEFT  | TGTCTTAAATTGTCACATCAATCTGACAT  | FWD         | 10µl   |
| SARS-CoV-2_25_RIGHT | TCACGAGTGACACCACCATCAA         | REV         | 10µl   |
| SARS-CoV-2_27_LEFT  | CTGGTTTGCCTGGCAGGATATT         | FWD         | 10µl   |
| SARS-CoV-2_27_RIGHT | TCTACACCACAGAAAACCTCCTGGT      | REV         | 10µl   |
| SARS-CoV-2_29_LEFT  | ACAGTCATGTAGTTGCCTTTAATACTTTAC | FWD         | 10µl   |
| SARS-CoV-2_29_RIGHT | GAGCCTTTGCGAGATGACAACA         | REV         | 10µl   |
| SARS-CoV-2_31_LEFT  | AACGGTCTTTGGCTTGATGACG         | FWD         | 10µl   |
| SARS-CoV-2_31_RIGHT | ACCTTCTAAGTCTGTGCCAGCA         | REV         | 10µl   |
| SARS-CoV-2_33_LEFT  | TGTGGCTATGAAGTACAATTATGAACCT   | FWD         | 10µl   |
| SARS-CoV-2_33_RIGHT | AGCTACAGTGGCAAGAGAAGGT         | REV         | 10µl   |
| SARS-CoV-2_35_LEFT  | TGGTGCTAGGAGAGTGTGGACA         | FWD         | 10µl   |
| SARS-CoV-2_35_RIGHT | GGCTACTTTGATACAAGGTTTGCC       | REV         | 10µl   |
| SARS-CoV-2_37_LEFT  | CTTTCCATGCAGGGTGCTGTAG         | FWD         | 10µl   |
| SARS-CoV-2_37_RIGHT | GTTTGGCTGCTGTTGTAAGAGGT        | REV         | 10µl   |
| SARS-CoV-2_39_LEFT  | ACAATTCACCTAATTTAGCATGGCCT     | FWD         | 10µl   |
| SARS-CoV-2_39_RIGHT | TTGGTTGTCCCCACTAGCTAG          | REV         | 10µl   |
| SARS-CoV-2_41_LEFT  | AGTATGTACAAATACCTACAACCTTGTGCT | FWD         | 10µl   |
| SARS-CoV-2_41_RIGHT | AGCATAGACGAGGTCTGCCATT         | REV         | 10µl   |
| SARS-CoV-2_43_LEFT  | TGGTATTGTTGGTGTACTGACATTAGA    | FWD         | 10µl   |
| SARS-CoV-2_43_RIGHT | AGGGTCAGCAGCATAACAAGT          | REV         | 10µl   |
| SARS-CoV-2_45_LEFT  | CACCTCTTCTTTGCTCAGGATGGT       | FWD         | 10µl   |
| SARS-CoV-2_45_RIGHT | AACATGTTGTGCCAACCACCAT         | REV         | 10µl   |
| SARS-CoV-2_47_LEFT  | TGTAGCTTGTACACCGTTTCT          | FWD         | 10µl   |
| SARS-CoV-2_47_RIGHT | AGTAAGGTCAGTCTCAGTCCAACA       | REV         | 10µl   |
| SARS-CoV-2_49_LEFT  | AGGAGTATGCTGATGTCTTTCATTTGT    | FWD         | 10µl   |
| SARS-CoV-2_49_RIGHT | CACCAGCATTTGTCCAGTCACA         | REV         | 10µl   |
| SARS-CoV-2_51_LEFT  | TCTTTCATGGGAAGTTGGTAAACCT      | FWD         | 20µl   |
| SARS-CoV-2_51_RIGHT | TCACATAGTGCATCAACAGCGG         | REV         | 20µl   |
| SARS-CoV-2_53_LEFT  | TGTCAATGCCAGATTAYGTGCT         | FWD         | 10µl   |
| SARS-CoV-2_53_RIGHT | CAAGAGTGAGCTGTTTCAGTGGT        | REV         | 10µl   |

|                     |                                |     |      |
|---------------------|--------------------------------|-----|------|
| SARS-CoV-2_55_LEFT  | TGTTGACACTAAATTCAAAACCTGAAGGT  | FWD | 20µl |
| SARS-CoV-2_55_RIGHT | TGTCAACTCAAAGCCATGTGCC         | REV | 20µl |
| SARS-CoV-2_57_LEFT  | CGTTTATGATTGATGTTCAACAATGGGG   | FWD | 10µl |
| SARS-CoV-2_57_RIGHT | ACAACCAGGCAAGTTAAGGTTAGA       | REV | 10µl |
| SARS-CoV-2_59_LEFT  | AGTCTCATGGAAAACAAGTAGTGTCA     | FWD | 10µl |
| SARS-CoV-2_59_RIGHT | ATTAGCAGCAATGTCCACACCC         | REV | 10µl |
| SARS-CoV-2_61_LEFT  | AGAAATGCCCGTAATGGTGTCT         | FWD | 10µl |
| SARS-CoV-2_61_RIGHT | TGAACCTGTTTGCGCATCTGTT         | REV | 10µl |
| SARS-CoV-2_63_LEFT  | TGGCCATGTAGAAACATTTTACCCA      | FWD | 10µl |
| SARS-CoV-2_63_RIGHT | ATAGCCACGGAACCTCCAAGAG         | REV | 10µl |
| SARS-CoV-2_65_LEFT  | GGCAAACCACGCGAACAAATAR         | FWD | 10µl |
| SARS-CoV-2_65_RIGHT | ACCTCTTAGTACCATTGGTCCCA        | REV | 10µl |
| SARS-CoV-2_67_LEFT  | CAATTTTGTAAATGATCCATTTTTGGGTGT | FWD | 10µl |
| SARS-CoV-2_67_RIGHT | GGTCAAGTGCACAGTCTACAGC         | REV | 10µl |
| SARS-CoV-2_69_LEFT  | ACTGTGTTGCTGATTATTCTGTCT       | FWD | 20µl |
| SARS-CoV-2_69_RIGHT | TAGGTCCACAAACAGTTGCTGG         | REV | 20µl |
| SARS-CoV-2_71_LEFT  | ACTTCTAACCAGTTGCTGTTCTT        | FWD | 10µl |
| SARS-CoV-2_71_RIGHT | CAGCTATTCCAGTTAAAGCACGGT       | REV | 10µl |
| SARS-CoV-2_73_LEFT  | CTTGCAGATGCTGGCTTCATCA         | FWD | 10µl |
| SARS-CoV-2_73_RIGHT | TGCACTTCAGCCTCAACTTTGT         | REV | 10µl |
| SARS-CoV-2_75_LEFT  | CTTCCCTCAGTCAGCACCTCAT         | FWD | 10µl |
| SARS-CoV-2_75_RIGHT | CAAGCCAGCTATAAAACCTAGCCA       | REV | 10µl |
| SARS-CoV-2_77_LEFT  | TGGAAGTGTAACTTTGAAGCAAGGT      | FWD | 10µl |
| SARS-CoV-2_77_RIGHT | GACTTGTTGTGCCATCACCTGA         | REV | 10µl |
| SARS-CoV-2_79_LEFT  | GGTGTGGAACATGTTACCTTCTTCAT     | FWD | 10µl |
| SARS-CoV-2_79_RIGHT | GTACCGTTGGAATCTGCCATGG         | REV | 10µl |
| SARS-CoV-2_81_LEFT  | CTTGTTTTGTGCTTGCTGCTGT         | FWD | 10µl |
| SARS-CoV-2_81_RIGHT | ACTGCTACTGGAATGGTCTGTGT        | REV | 10µl |
| SARS-CoV-2_83_LEFT  | TGAAGAGCAACCAATGGAGATTGA       | FWD | 10µl |
| SARS-CoV-2_83_RIGHT | TGTTTCGTTTAGGCGTGACAAGT        | REV | 10µl |
| SARS-CoV-2_85_LEFT  | AGCACCTTTAATTGAATTGTGCGTG      | FWD | 10µl |
| SARS-CoV-2_85_RIGHT | CGTCTGGTAGCTCTTCGGTAGT         | REV | 10µl |
| SARS-CoV-2_87_LEFT  | AAAAGATCACATTGGCACCCGC         | FWD | 10µl |
| SARS-CoV-2_87_RIGHT | CGACATTCCGAAGAACGCTGAA         | REV | 10µl |
| SARS-CoV-2_89_LEFT  | AGGCTGATGAAACTCAAGCCTT         | FWD | 20µl |
| SARS-CoV-2_89_RIGHT | AAAATCACATGGGGATAGCACTACT      | REV | 20µl |

| Mix                 | 2                              |             |        |
|---------------------|--------------------------------|-------------|--------|
| Name                | Sequence                       | Orientation | Volume |
| SARS-CoV-2_2_LEFT   | TCGTACGTGGCTTTGGAGACTC         | FWD         | 10µl   |
| SARS-CoV-2_2_RIGHT  | ATGCACTCAAGAGGGTAGCCAT         | REV         | 10µl   |
| SARS-CoV-2_4_LEFT   | ACACCTTCAATGGGGAATGTCC         | FWD         | 10µl   |
| SARS-CoV-2_4_RIGHT  | AGGCACACTTGTTATGGCAACC         | REV         | 10µl   |
| SARS-CoV-2_6_LEFT   | TGTGAAAGGTTTGGATTATAAAGCATTCA  | FWD         | 10µl   |
| SARS-CoV-2_6_RIGHT  | ACAGGTGACAATTTGTCCACCG         | REV         | 10µl   |
| SARS-CoV-2_8_LEFT   | AGGGAGAAACACTTCCCACAGA         | FWD         | 10µl   |
| SARS-CoV-2_8_RIGHT  | AATCAATGCCCAGTGGTGTAAGT        | REV         | 10µl   |
| SARS-CoV-2_10_LEFT  | TGAGTATGGTACTGAAGATGATTACCAAG  | FWD         | 10µl   |
| SARS-CoV-2_10_RIGHT | GCCGACAACATGAAGACAGTGT         | REV         | 10µl   |
| SARS-CoV-2_12_LEFT  | ACTGTTTCGCACGAAYGTCTACT        | FWD         | 10µl   |
| SARS-CoV-2_12_RIGHT | CCTGACCCGGGTAAGTGGTTAT         | REV         | 10µl   |
| SARS-CoV-2_14_LEFT  | GTTTCAACTATACAGCGTAAATATAAGGGT | FWD         | 20µl   |
| SARS-CoV-2_14_RIGHT | CGTGTGGAGGTTAATGTTGTCTACT      | REV         | 20µl   |
| SARS-CoV-2_16_LEFT  | AGGTACATGTCAGCATTAAATCACACT    | FWD         | 10µl   |
| SARS-CoV-2_16_RIGHT | AGTTCATACTGAGCAGGTGGTG         | REV         | 10µl   |
| SARS-CoV-2_18_LEFT  | CAGTTACACAACAACCATAAAACCACT    | FWD         | 10µl   |
| SARS-CoV-2_18_RIGHT | GATTATCCATTCCCTGCGCGTC         | REV         | 10µl   |
| SARS-CoV-2_20_LEFT  | TACAGAAGAGGTTGGCCACACA         | FWD         | 7.5µl  |
| SARS-CoV-2_20_RIGHT | AACACYTAAAGCAGCGGTTGAG         | REV         | 7.5µl  |
| SARS-CoV-2_22_LEFT  | AGTTGCAGAGTGGTTTTTGGCA         | FWD         | 10µl   |
| SARS-CoV-2_22_RIGHT | ACTGTAGTGACAAGTCTCTCGCA        | REV         | 10µl   |
| SARS-CoV-2_24_LEFT  | AGCTAATAACACTAAAGGTTTCATTGCCT  | FWD         | 10µl   |
| SARS-CoV-2_24_RIGHT | TGACTTTTTGCTACCTGCGCAT         | REV         | 10µl   |
| SARS-CoV-2_26_LEFT  | TGGTTGAAGCAGTTAATTAAGTTACACT   | FWD         | 10µl   |
| SARS-CoV-2_26_RIGHT | TTCAGCAGCCAAAACACAAGCT         | REV         | 10µl   |
| SARS-CoV-2_28_LEFT  | CCTTGAAGGTTCTGTTAGAGTGGT       | FWD         | 10µl   |
| SARS-CoV-2_28_RIGHT | AGGTGTGAACATAACCATCCACTG       | REV         | 10µl   |
| SARS-CoV-2_30_LEFT  | AGAAATGTATCTAAAGTTGCGTAGTGATG  | FWD         | 10µl   |
| SARS-CoV-2_30_RIGHT | CCCTGAGTTGAACATTACCAGCC        | REV         | 10µl   |
| SARS-CoV-2_32_LEFT  | TACCAATGTGCTATGAGGCCCA         | FWD         | 10µl   |
| SARS-CoV-2_32_RIGHT | GCACTACCCAATATGGTACGTCC        | REV         | 10µl   |
| SARS-CoV-2_34_LEFT  | GTCCAGAGTACTCAATGGTCTTTGT      | FWD         | 10µl   |
| SARS-CoV-2_34_RIGHT | ACCTCTGGCCAAAACATGACA          | REV         | 10µl   |
| SARS-CoV-2_36_LEFT  | CGCTACTTTAGACTGACTCTTGGTG      | FWD         | 10µl   |
| SARS-CoV-2_36_RIGHT | ATCACCATTAGCAACAGCCTGC         | REV         | 10µl   |
| SARS-CoV-2_38_LEFT  | AGATCTGAGGACAAGAGGGCAA         | FWD         | 10µl   |
| SARS-CoV-2_38_RIGHT | TGTCATCAGTGCAAGCAGTTTGT        | REV         | 10µl   |
| SARS-CoV-2_40_LEFT  | GGTATGGTACTTGGTAGTTTAGCTGC     | FWD         | 10µl   |
| SARS-CoV-2_40_RIGHT | ACGATTGTGCATCAGCTGACTG         | REV         | 10µl   |
| SARS-CoV-2_42_LEFT  | TCTCTAACTACCAACATGAAGAAACAATTT | FWD         | 20µl   |
| SARS-CoV-2_42_RIGHT | GCAGTTAAAGCCCTGGTCAAGG         | REV         | 20µl   |
| SARS-CoV-2_44_LEFT  | TGGACCACTAGTGAGAAAAATATTTGTTG  | FWD         | 10µl   |
| SARS-CoV-2_44_RIGHT | ACAGCCACCATCGTAACAATCA         | REV         | 10µl   |
| SARS-CoV-2_46_LEFT  | TGCAAAGAATAGAGCTCGCACC         | FWD         | 10µl   |
| SARS-CoV-2_46_RIGHT | TGCATTAACATTGGCCGTGACA         | REV         | 10µl   |
| SARS-CoV-2_48_LEFT  | CTCTCTGACGATGCTGTTGTGT         | FWD         | 10µl   |
| SARS-CoV-2_48_RIGHT | TGCGGTGTGTACATAGCCTCAT         | REV         | 10µl   |
| SARS-CoV-2_50_LEFT  | AGGAGGTATGAGCTATTATTGTAAATCACA | FWD         | 10µl   |
| SARS-CoV-2_50_RIGHT | GTTGTACCTCGGTAACAACAGCA        | REV         | 10µl   |
| SARS-CoV-2_52_LEFT  | TGCAAATTATCAAAGGTTGGTATGCA     | FWD         | 10µl   |
| SARS-CoV-2_52_RIGHT | CCGAGGAACATGTCTGGACCTA         | REV         | 10µl   |
| SARS-CoV-2_54_LEFT  | TGGAGAAAAGCTGTCTTTATTTACCT     | FWD         | 10µl   |
| SARS-CoV-2_54_RIGHT | GCTTCTTCGCGGGTGATAAACA         | REV         | 10µl   |
| SARS-CoV-2_56_LEFT  | ACCACCGCCTGGAGATCAATTT         | FWD         | 10µl   |
| SARS-CoV-2_56_RIGHT | CGCTTAACAAAGCACTCGTGGA         | REV         | 10µl   |

|                     |                                |     |       |
|---------------------|--------------------------------|-----|-------|
| SARS-CoV-2_58_LEFT  | GCCTTGTAGTGACAAAGCTTATAAAATAGA | FWD | 10µl  |
| SARS-CoV-2_58_RIGHT | AAACCCACAAGCTAAAGCCAGC         | REV | 10µl  |
| SARS-CoV-2_60_LEFT  | CAGGGTGAAGTACCAGTTTCTATCATT    | FWD | 10µl  |
| SARS-CoV-2_60_RIGHT | GAGTAAAGTAAGTTTCAGGTAATTGTTGG  | REV | 10µl  |
| SARS-CoV-2_62_LEFT  | TCGTTTATGGAGATTTTAGTCATAGTCAGT | FWD | 10µl  |
| SARS-CoV-2_62_RIGHT | TTGCGACATTCATCATTATGCCTTT      | REV | 10µl  |
| SARS-CoV-2_64_LEFT  | CTGTACATACAGCTAATAAATGGGATCTCA | FWD | 10µl  |
| SARS-CoV-2_64_RIGHT | TTTGACCTTCTTTTAAAGACATAACAGCA  | REV | 10µl  |
| SARS-CoV-2_66_LEFT  | ACCCCCTGCATACACTAATTCTYT       | FWD | 10µl  |
| SARS-CoV-2_66_RIGHT | ACCCTGTTTTCTTCAAGGTCC          | REV | 10µl  |
| SARS-CoV-2_68_LEFT  | ACATAGAAGTTATTTGACTCCTGGTGA    | FWD | 10µl  |
| SARS-CoV-2_68_RIGHT | CCCTGGAGCGATTTGTCTGACT         | REV | 10µl  |
| SARS-CoV-2_70_LEFT  | CCGGTAGCACACCTTGTAAATGG        | FWD | 10µl  |
| SARS-CoV-2_70_RIGHT | CCCCTATTAACAGCCTGCACG          | REV | 10µl  |
| SARS-CoV-2_72_LEFT  | TGTTACCACAGAAATTCTACCAGTGT     | FWD | 10µl  |
| SARS-CoV-2_72_RIGHT | TACCCGCTAACAGTGCAGAAGT         | REV | 10µl  |
| SARS-CoV-2_74_LEFT  | GTGCACTTGAAAACCTCAAGATGT       | FWD | 10µl  |
| SARS-CoV-2_74_RIGHT | TGTTACAAACCAGTGTGTGCCA         | REV | 10µl  |
| SARS-CoV-2_76_LEFT  | GTTGATTTAGGTGACATCTCTGGCA      | FWD | 7.5µl |
| SARS-CoV-2_76_RIGHT | AGCGCTCTGAAAACAGCAAGA          | REV | 7.5µl |
| SARS-CoV-2_78_LEFT  | CTTTGGCTTTGCTGGAAATGCC         | FWD | 10µl  |
| SARS-CoV-2_78_RIGHT | GTGCTTACAAAGGCACGCTAGT         | REV | 10µl  |
| SARS-CoV-2_80_LEFT  | ACGTGAGTCTTGTA AACCTTCTTTTT    | FWD | 10µl  |
| SARS-CoV-2_80_RIGHT | AATGACCACATGGAACGCGTAC         | REV | 10µl  |
| SARS-CoV-2_82_LEFT  | GGACCTGCCTAAAGAAATCACTGT       | FWD | 10µl  |
| SARS-CoV-2_82_RIGHT | TGCCCTCGTATGTTCCAGAAGA         | REV | 10µl  |
| SARS-CoV-2_84_LEFT  | CTTCACACTCAAAGAAAGACAGAATGA    | FWD | 10µl  |
| SARS-CoV-2_84_RIGHT | ACGAACAACGCACTACAAGACT         | REV | 10µl  |
| SARS-CoV-2_86_LEFT  | GGCCCCAAGGTTTACCCAATAA         | FWD | 10µl  |
| SARS-CoV-2_86_RIGHT | CTGTTGCGACTACGTGATGAGG         | REV | 10µl  |
| SARS-CoV-2_88_LEFT  | TAACACAAGCTTTCGGCAGACG         | FWD | 10µl  |
| SARS-CoV-2_88_RIGHT | GTGGTCTGCATGAGTTTAGGCC         | REV | 10µl  |

FWD: forward; REV: reverse

a

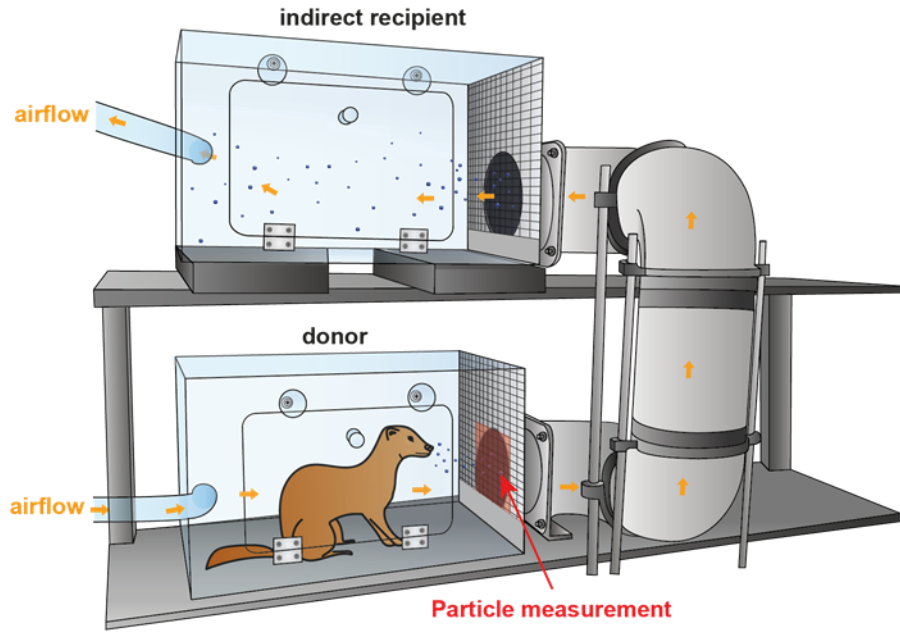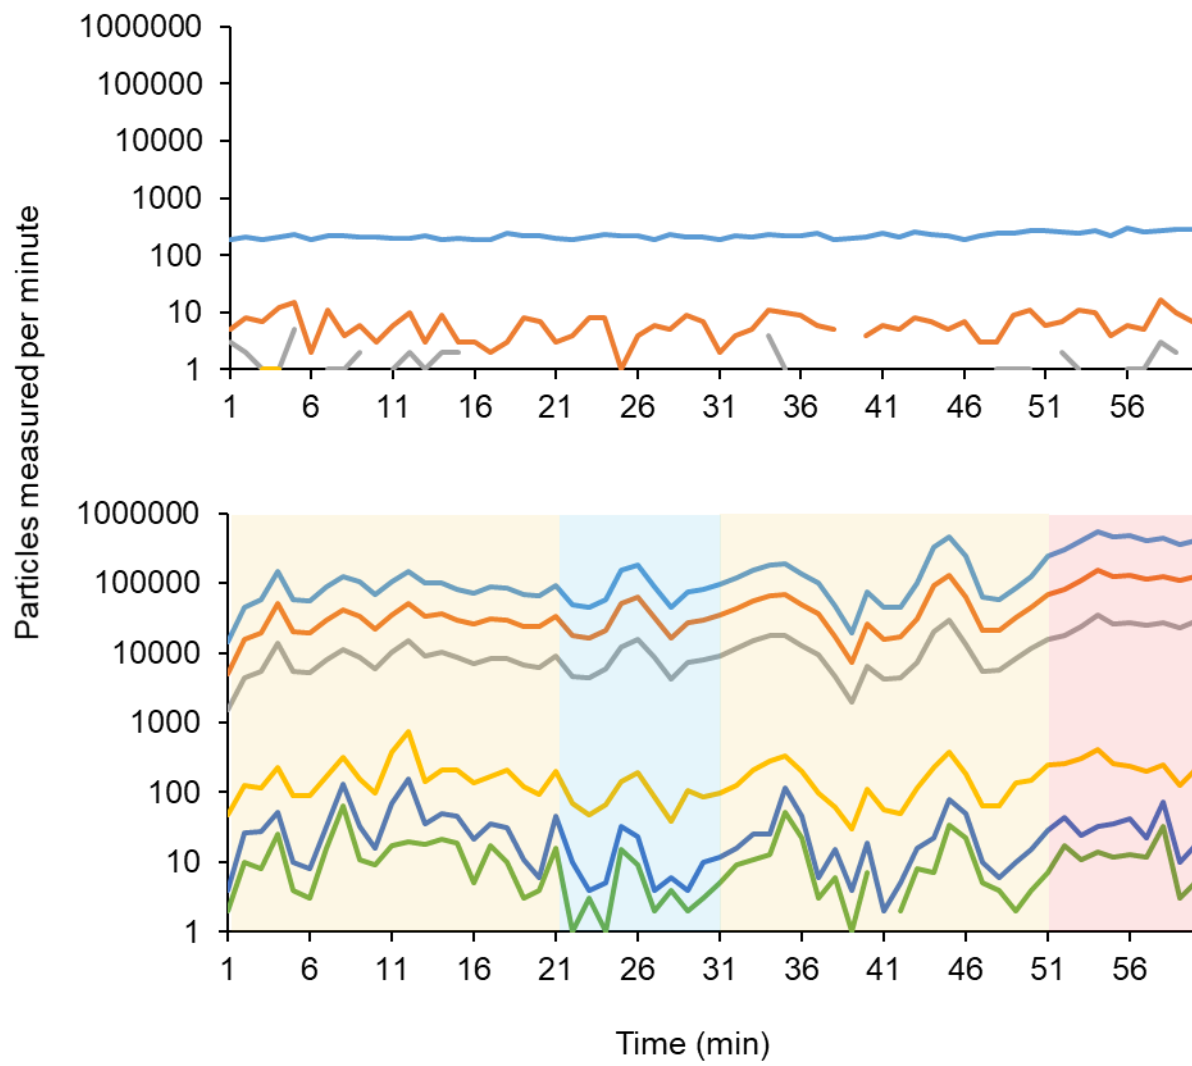



b

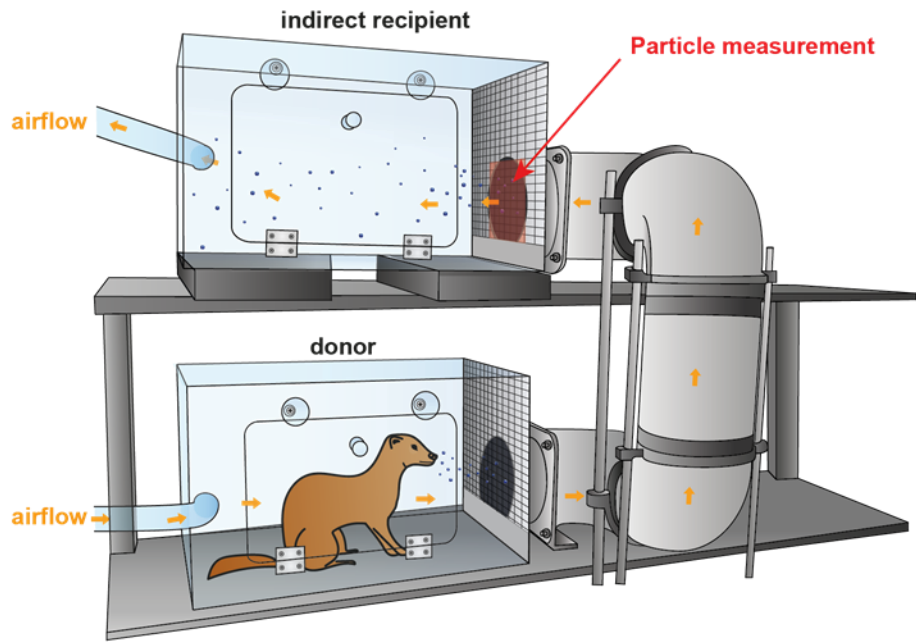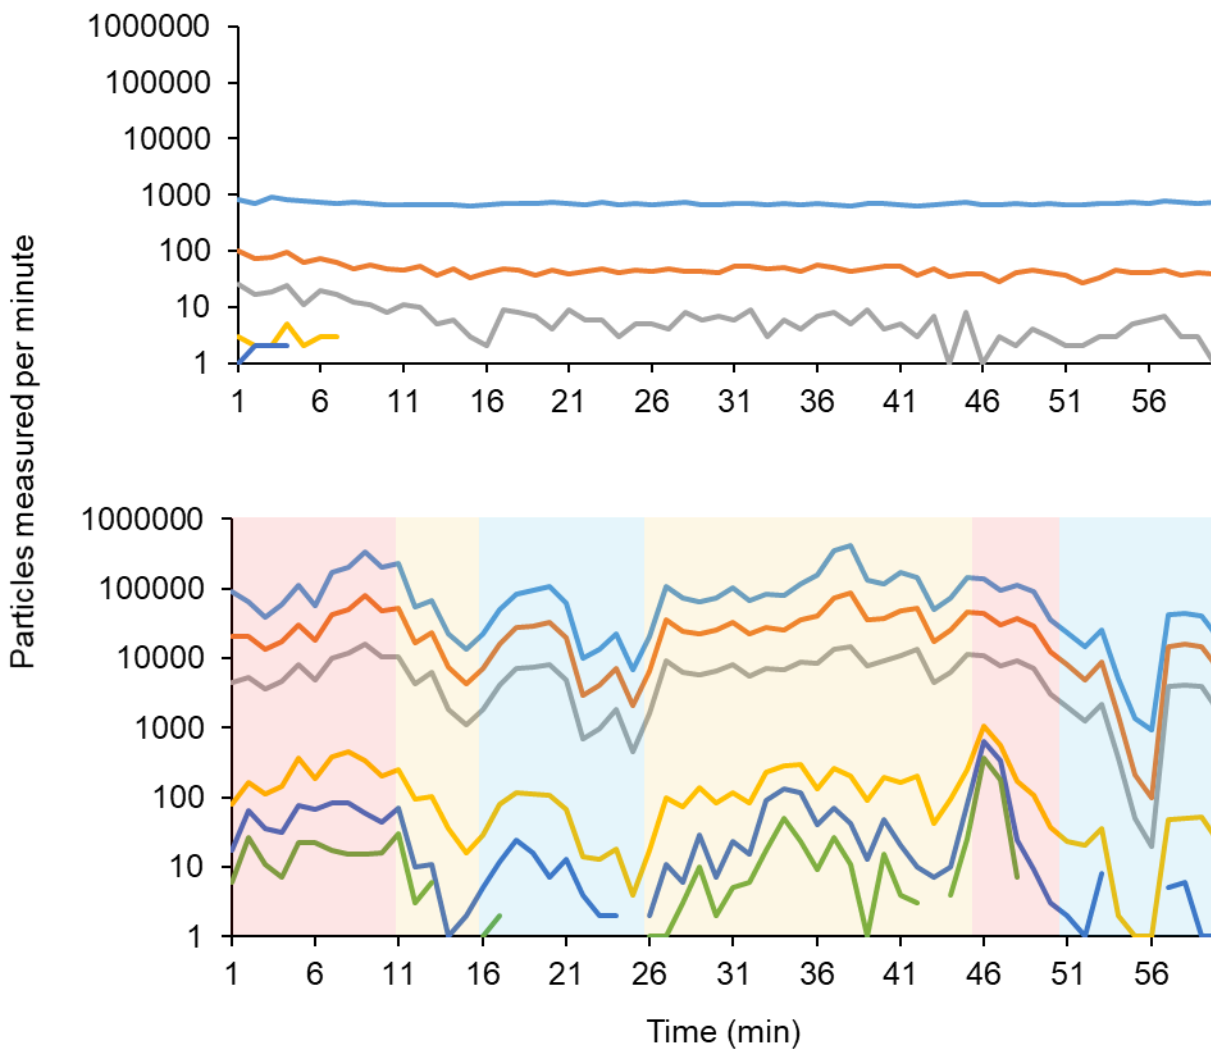

**Figure S1. Number and particle size distribution of aerosols and droplets in the experimental set-up.** The number and size of particles entering (a) and exiting (b) the tubing system was recorded continuously with an aerodynamic particle sizer (APS) every minute for a total of 60 min. Measurements were performed without (upper graph) and with (bottom graph) one uninfected ferret present in the bottom cage to determine the number and size distribution of particles (0.3  $\mu\text{m}$ : light blue, 0.5  $\mu\text{m}$ : orange, 1.0  $\mu\text{m}$ : grey, 3.0  $\mu\text{m}$ : yellow, 5.0  $\mu\text{m}$ : dark blue and 10.0  $\mu\text{m}$  green) originating from the caging environment itself and from the ferret. In order to correlate the amount and size of particles with the activity of the ferret, the animal's behavior was recorded every 5 minutes. The activity was scored based on three categories and shown as color shading in the bottom graphs: calm (blue), active (yellow) and agitated (red). Calm included resting, occasional grooming; active included moving around, exploring, occasional scratching of walls and carpet; agitated included agitated movement, intense scratching of walls and carpet. Source data are provided as a Source Data file.

a

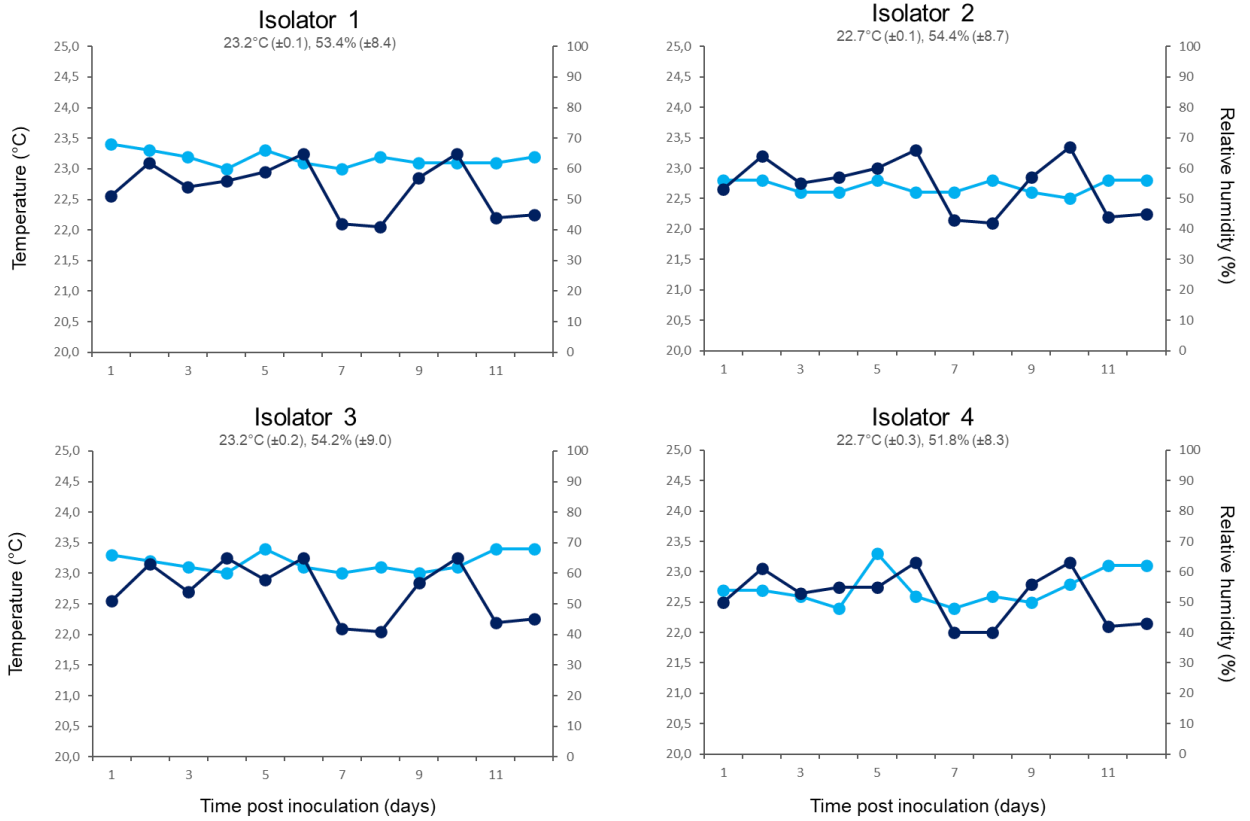

b

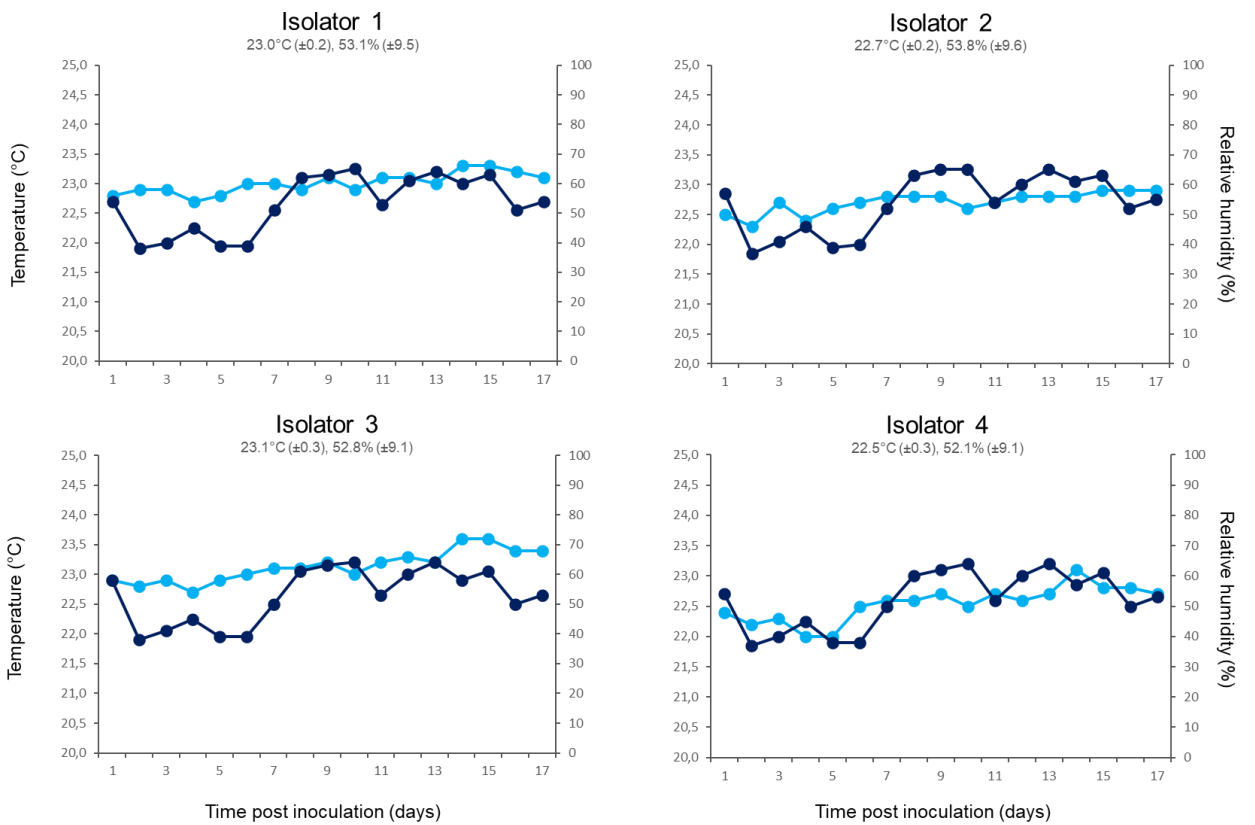

**Figure S2. Environmental parameters in class III isolators.** Graphs show temperature and relative humidity recordings in each isolator during SARS-CoV (a) and SARS-CoV-2 (b) transmission experiments. Light and dark blue circles and lines represent temperature and relative humidity measurements, respectively. Average values and standard deviation ( $\pm$ SD) are calculated from n=12 and n=17 recordings for SARS-CoV and SARS-CoV-2, respectively and shown below the title. Source data are provided as a Source Data file.
